# Supplementary material
Source: Springer Nature journal article supplement (https://www.springermedizin.de/resource/supplementary/12889_2014_7295_MOESM5_ESM.pdf/9499694)

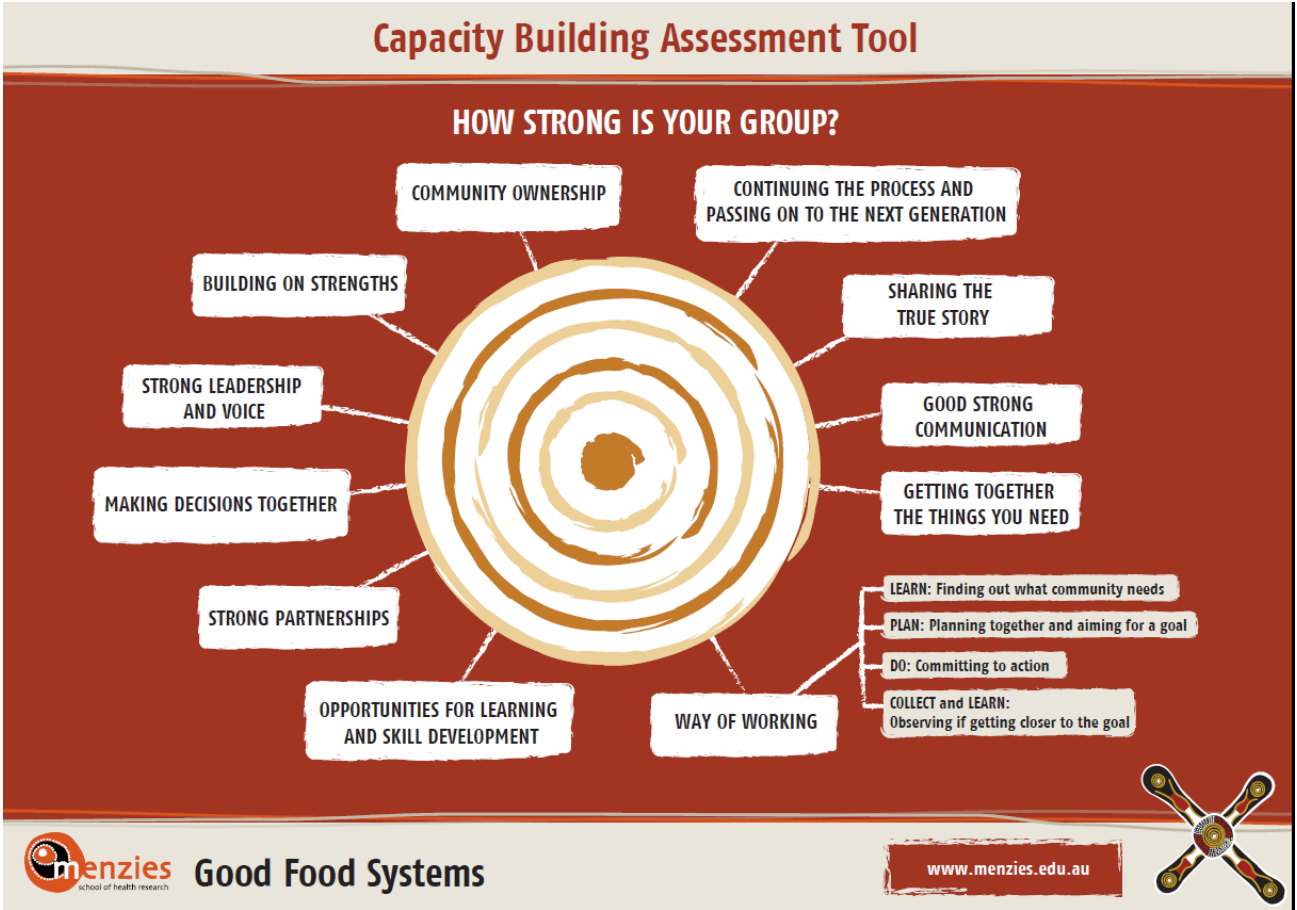

Figure 3. The capacity building assessment tool

Supplement: MOESM5 [file 9499694]
